# Supplementary material for: Isolation and Expansion of Multipotent Progenitors from Human Trabecular Meshwork
Source: PubMed Central journal article supplement (PMC5809375; doi:10.1038/s41598-018-21098-2), 2018-02-12
Supplement: 41598_2018_21098_MOESM1_ESM.pdf [file 41598_2018_21098_MOESM1_ESM.pdf]

# Isolation and Expansion of Multipotent Progenitors from Human Trabecular Meshwork

Yuan Zhang<sup>1\*</sup>, Subo Cai<sup>2\*</sup>, Scheffer C. G. Tseng<sup>1</sup> and Ying-Ting Zhu<sup>1#</sup>

<sup>1</sup>Research and Development Department, Tissue Tech, Inc., Miami, FL, USA

<sup>2</sup>Department of Ophthalmology, Union Hospital, Tongji Medical College, Huazhong University of Science and Technology, Wuhan, China

\*The first two authors contribute equally to this manuscript.

**Short Running Head:** Multipotent Progenitors from Trabecular Meshwork

**Key Words:** isolation, expansion, trabecular meshwork, progenitors, corneal endothelium, BMP

**#Author for Correspondence:** Ying-Ting Zhu, Ph.D., R&D Department, TissueTech, Inc., 7000 SW 97<sup>th</sup> Avenue, Suite 212, Miami, FL 33173. Telephone: (786) 456-7632; Fax: (305) 274-1297; E-mail: [yzhu@tissuetechinc.com](mailto:yzhu@tissuetechinc.com)

# Supplementary Information

**Supplementary Fig. S1. Morphological analysis by phase-contrast microscopy.**

TM cells were expanded on 2D Matrigel in MESCM or MESCM+5% FBS and each passage was subjected to morphological analysis by phase-contrast microscopy (scale bar: 100  $\mu$ m).

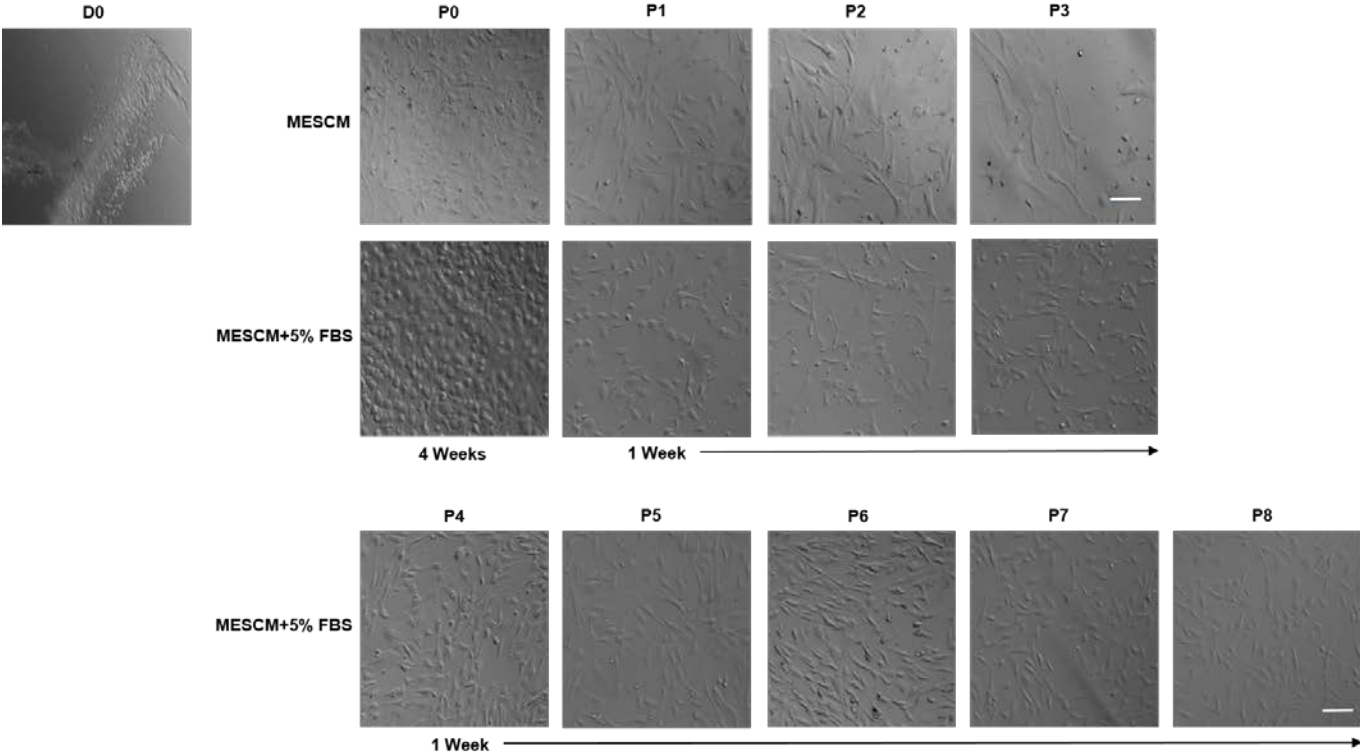

**Supplementary Fig. S2. Analysis of CD73, CD90, CD166 and BMI1.**

Freshly isolated TM cells (D0) and TM cells cultured on 2D Matrigel in MESCM+5% FBS were subjected to qRT-PCR for transcription expression of CD73, CD90, CD166 and BMI1 (A, using freshly isolated TM cells as the control, n=3, \*P<0.05). In addition, P3 cells cultured on 2D Matrigel in MESCM+5% FBS were reseeded in 3D Matrigel with or without Noggin before analysis by qRT-PCR for CD73, CD90, CD166 and BMI1 (B, n=3, \*P<0.05) by setting the expression level for 2D Matrigel as the control.

Although CD73, CD90, CD166 and Bmi1 was reported by others as TM ESC markers<sup>1</sup>, we have noted that the expression of CD90 was not found in TM progenitor progenitors in our system. In addition, though the expression of CD73, CD166 or Bmi1 was found in TM cells expanded in our system, CD73 was upregulated from passage 1 to passage 7, CD166 was downregulated from passage 2 to passage 7, and Bmi1 was upregulated at passage 1. Furthermore, the expression of those markers were not affected by 3D Matrigel.

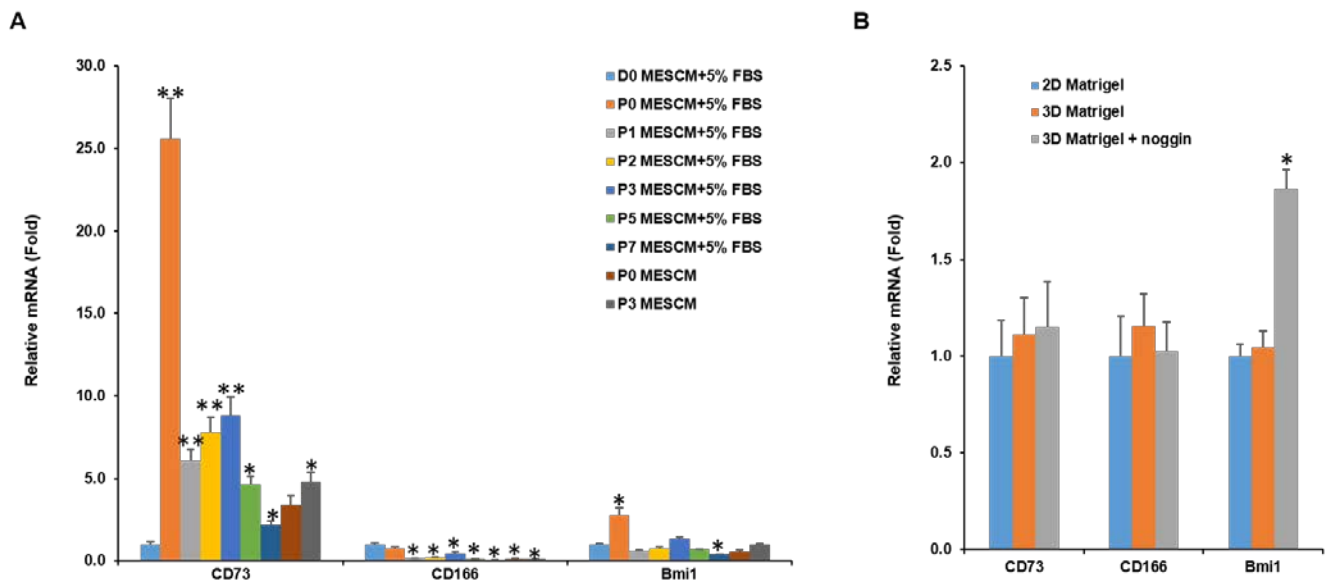

**Supplementary Table S1. Data for Fig. 3A, Expanded TM cells lose their phenotype and progenitor status on 2D Matrigel**

| Group  | Group 1                   | Group 2                   | Group 3                   | Group 4                   | Group 5                   | Group 6                   | Group 7                   | Group 8             | Group 9             | P value<br>(compare<br>to D0) |
|--------|---------------------------|---------------------------|---------------------------|---------------------------|---------------------------|---------------------------|---------------------------|---------------------|---------------------|-------------------------------|
|        | D0<br>MESCM<br>+5%<br>FBS | P0<br>MESCM<br>+5%<br>FBS | P1<br>MESCM<br>+5%<br>FBS | P2<br>MESCM<br>+5%<br>FBS | P3<br>MESCM<br>+5%<br>FBS | P5<br>MESCM<br>+5%<br>FBS | P7<br>MESCM<br>+5%<br>FBS | P0<br>MESCM         | P3<br>MESCM         |                               |
| ABCG2  | 1.000<br>±0.006           | 0.235<br>±0.050           | 0.251<br>±0.060           | 0.283<br>±0.055           | 0.086<br>±0.012           | 0.285<br>±0.037           | 0.166<br>±0.022           | 0.317<br>±0.041     | 0.133<br>±0.028     | Group<br>2-9<br><0.05         |
| Myc    | 1.000<br>±0.094           | 0.021<br>±0.002           | 0.050<br>±0.006           | 0.041<br>±0.004           | 0.037<br>±0.013           | 0.057<br>±0.019           | 0.060<br>±0.007           | 0.054<br>±0.007     | 0.029<br>±0.004     | Group<br>2-9<br><0.05         |
| KLF4   | 1.000<br>±0.138           | 0.005<br>±0.0006          | 0.003<br>±0.0006          | 0.005<br>±0.005           | 0.001<br>±0.00008         | 0.001<br>±0.00009         | 0.001<br>±0.00016         | 0.001<br>±0.00027   | 0.002<br>±0.00020   | Group<br>2-9<br><0.05         |
| Nanog  | 1.000<br>±0.109           | 0.100<br>±0.008           | 0.030<br>±0.003           | 0.036<br>±0.015           | 0.047<br>±0.006           | 0.003<br>±0.001           | 0.003<br>±0.0004          | 0.012<br>±0.002     | 0.010<br>±0.002     | Group<br>2-9<br><0.05         |
| Nestin | 1.000<br>±0.103           | 0.083<br>±0.003           | 0.033<br>±0.003           | 0.075<br>±0.055           | 0.050<br>±0.007           | 0.021<br>±0.002           | 0.009<br>±0.001           | 0.013<br>±0.001     | 0.008<br>±0.001     | Group<br>2-9<br><0.05         |
| Oct4   | 1.000<br>±0.055           | 0.102<br>±0.017           | 0.028<br>±0.005           | 0.031<br>±0.082           | 0.063<br>±0.011           | 0.006<br>±0.001           | 0.004<br>±0.001           | 0.013<br>±0.002     | 0.011<br>±0.001     | Group<br>2-9<br><0.05         |
| Rex1   | 1.000<br>±0.014           | 0.250<br>±0.003           | 0.061<br>±0.001           | 0.305<br>±0.065           | 0.243<br>±0.027           | 0.120<br>±0.017           | 0.143<br>±0.015           | 0.102<br>±0.012     | 0.057<br>±0.008     | Group<br>2-9<br><0.05         |
| Sox2   | 1.000<br>±0.014           | 0.046<br>±0.010           | 0.009<br>±0.002           | 0.010<br>±0.019           | 0.023<br>±0.003           | 0.001<br>±0.0001          | 0.002<br>±0.0002          | 0.003<br>±0.0003    | 0.003<br>±0.0003    | Group<br>2-9<br><0.05         |
| SSEA4  | 1.000<br>±0.019           | 0.818<br>±0.103           | 0.696<br>±0.117           | 1.074<br>±0.155           | 0.657<br>±0.040           | 0.368<br>±0.038           | 0.431<br>±0.031           | 0.439<br>±0.042     | 0.413<br>±0.030     | Group<br>6-9<br><0.05         |
| FOXD3  | 1.000<br>±0.068           | 0.005<br>±0.001           | 0.002<br>±0.0006          | 0.002<br>±0.001           | 0.001<br>±0.00033         | 0.00005<br>±0.00002       | 0.00008<br>±0.00002       | 0.00019<br>±0.00005 | 0.00026<br>±0.00013 | Group<br>2-9<br><0.05         |
| HNK1   | 1.000<br>±0.003           | 0.016<br>±0.003           | 0.004<br>±0.001           | 0.002<br>±0.0001          | 0.102<br>±0.051           | 0.103<br>±0.050           | 0.205<br>±0.062           | 0.010<br>±0.049     | 0.750<br>±0.059     | Group<br>2-8<br><0.05         |
| MSX1   | 1.000<br>±0.074           | 0.077<br>±0.012           | 0.044<br>±0.002           | 0.084<br>±0.008           | 0.028<br>±0.016           | 0.014<br>±0.001           | 0.011<br>±0.002           | 0.015<br>±0.002     | 0.004<br>±0.001     | Group<br>2-9<br><0.05         |
| p75NTR | 1.000<br>±0.055           | 0.088<br>±0.003           | 0.006<br>±0.001           | 0.004<br>±0.001           | 0.093<br>±0.032           | 0.033<br>±0.011           | 0.089<br>±0.014           | 0.089<br>±0.014     | 0.013<br>±0.001     | Group<br>2-9<br><0.05         |
| Sox9   | 1.000<br>±0.031           | 0.561<br>±0.033           | 0.616<br>±0.038           | 0.601<br>±0.102           | 0.413<br>±0.054           | 0.676<br>±0.093           | 0.486<br>±0.077           | 0.616<br>±0.147     | 0.273<br>±0.035     | Group<br>2-5,7,9<br><0.05     |
| Sox10  | 1.000<br>±0.209           | 0.567<br>±0.033           | 0.093<br>±0.034           | 0.022<br>±0.034           | 0.058<br>±0.040           | 0.0009<br>±0.0003         | 0.0001<br>±0.00001        | 0.111<br>±0.016     | 0.003<br>±0.0004    | Group<br>2-9<br><0.05         |
| PDGFRβ | 1.000<br>±0.043           | 0.728<br>±0.045           | 1.312<br>±0.307           | 1.473<br>±0.098           | 0.867<br>±0.131           | 0.917<br>±0.102           | 0.922<br>±0.079           | 1.867<br>±0.155     | 1.292<br>±0.158     | Group 8<br><0.05              |
| N-cad  | 1.000<br>±0.013           | 0.161<br>±0.004           | 0.138<br>±0.001           | 0.133<br>±0.012           | 0.138<br>±0.010           | 0.037<br>±0.004           | 0.047<br>±0.003           | 0.067<br>±0.003     | 0.051<br>±0.004     | Group<br>2-9<br><0.05         |

**Supplementary Table S2. Data for Fig. 3C, Expanded TM cells lose their phenotype and progenitor status on 2D Matrigel**

| Group  | Group 1                   | Group 2                   | Group 3                   | Group 4                   | Group 5                   | Group 6                   | Group 7                   | Group 8         | Group 9         | P value<br>(compare to D0) |
|--------|---------------------------|---------------------------|---------------------------|---------------------------|---------------------------|---------------------------|---------------------------|-----------------|-----------------|----------------------------|
|        | D0<br>MESCM<br>+5%<br>FBS | P0<br>MESCM<br>+5%<br>FBS | P1<br>MESCM<br>+5%<br>FBS | P2<br>MESCM<br>+5%<br>FBS | P3<br>MESCM<br>+5%<br>FBS | P5<br>MESCM<br>+5%<br>FBS | P7<br>MESCM<br>+5%<br>FBS | P0<br>MESCM     | P3<br>MESCM     |                            |
| Vim    | 1.000<br>±0.030           | 1.060<br>±0.023           | 0.480<br>±0.090           | 0.380<br>±0.060           | 0.590<br>±0.009           | 0.193<br>±0.009           | 0.232<br>±0.018           | 0.289<br>±0.037 | 0.314<br>±0.013 | Group<br>3-9<br><0.05      |
| AQP1   | 1.000<br>±0.114           | 0.023<br>±0.004           | 0.002<br>±0.0004          | 0.003<br>±0.001           | 0.063<br>±0.002           | 0.056<br>±0.004           | 0.082<br>±0.003           | 0.180<br>±0.117 | 0.079<br>±0.013 | Group<br>2-9<br><0.05      |
| CHI3L1 | 1.000<br>±0.115           | 0.215<br>±0.031           | 0.005<br>±0.001           | 0.004<br>±0.001           | 0.00025<br>±0.0002<br>1   | 0.00008<br>±0.0000<br>1   | 0.00001<br>±0.0000<br>02  | 2.957<br>±0.119 | 1.522<br>±0.018 | Group<br>2-9<br><0.05      |
| MGP    | 1.000<br>±0.150           | 0.137<br>±0.026           | 0.092<br>±0.017           | 0.130<br>±0.025           | 0.001<br>±0.001           | 0.015<br>±0.004           | 0.004<br>±0.001           | 0.187<br>±0.054 | 0.510<br>±0.149 | Group<br>2-9<br><0.05      |
| AnkG   | 1.000<br>±0.130           | 0.041<br>±0.003           | 0.041<br>±0.005           | 0.067<br>±0.005           | 0.007<br>±0.002           | 0.014<br>±0.003           | 0.006<br>±0.001           | 0.095<br>±0.028 | 0.109<br>±0.026 | Group<br>2-9<br><0.05      |

**Supplementary Table S3. Data for Fig. 4A, 3D Matrigel upregulates expression of TM markers**

| Group  | Group 1         | Group 2          | Group 3                   | P value<br>(compare to<br>2D<br>Matrigel) |
|--------|-----------------|------------------|---------------------------|-------------------------------------------|
|        | 2D<br>Matrigel  | 3D<br>Matrigel   | 3D<br>Matrigel<br>+noggin |                                           |
| Vim    | 1.000<br>±0.163 | 0.721<br>±0.183  | 1.225<br>±0.231           |                                           |
| AQP1   | 1.000<br>±0.195 | 1.677<br>±0.132  | 0.213<br>±0.167           | Group 2~3<br><0.05                        |
| CHI3L1 | 1.000<br>±0.278 | 3.126<br>±0.342  | 62.513<br>±3.739          | Group 2~3<br><0.05                        |
| MGP    | 1.000<br>±0.285 | 60.537<br>±2.636 | 20.121<br>±1.821          | Group 2~3<br><0.05                        |
| AnkG   | 1.000<br>±0.114 | 2.371<br>±0.348  | 1.351<br>±0.293           | Group 2<br><0.05                          |

**Supplementary Table S4. Materials Used for Isolation, Culture and Relevant Experiments of TM cells**

| <b>Materials</b>                                           | <b>Sources</b>           | <b>Catalog number</b> | <b>Concentration</b>                                          |
|------------------------------------------------------------|--------------------------|-----------------------|---------------------------------------------------------------|
| Amphotericin B                                             | Thermo Fisher Scientific | 15290026              | 50 µg/ml                                                      |
| Adipogenesis Differentiation Kit                           | Thermo Fisher Scientific | A1007001              | N/A                                                           |
| Ascorbic acid                                              | Sigma-Aldrich, Inc       | A1300000              | 0.5mM                                                         |
| Collagenase A                                              | Roche, Indianapolis, IN  | 11088793001           | 2 mg/ml                                                       |
| Complete Chondrogenesis Medium                             | Lifeline cell technology | LM-0022               | N/A                                                           |
| Collagen from human placenta                               | Sigma-Aldrich, Inc       | C5533                 | 1 x                                                           |
| Dulbecco's modified Eagle's Medium (DMEM)                  | Thermo Fisher Scientific | 21063029              | DMEM/F-12 (1:1)                                               |
| Dispase II                                                 | Roche, Indianapolis, IN  | 04942078001           | 10 mg/ml                                                      |
| F-12 nutrient mixture (F-12)                               | Thermo Fisher Scientific | 31765035              | DMEM/F-12 (1:1)                                               |
| Fetal Bovine Serum (FBS)                                   | Thermo Fisher Scientific | 10082147              | 5%                                                            |
| Fibronectin coating mix (Fibronectin)                      | AthenaES                 | 0407                  | 1 x                                                           |
| Fibroblast growth factor 2(FGF-2)                          | Sigma-Aldrich, Inc       | SRP4037               | 10 ng/ml                                                      |
| Gentamycin                                                 | Thermo Fisher Scientific | 15710072              | 1.25 µg/ml                                                    |
| Human Fibroblast Growth Factor-Basic (bFGF)                | Thermo Fisher Scientific | RFGB50                | 4 ng/ml                                                       |
| Insulin-Transferrin-sodium selenite media supplement (ITS) | Roche, Indianapolis, IN  | 10394000              | 5 µg/ml insulin, 5 µg/ml Transferrin, 5 ng/ml sodium selenite |
| Knockout Serum Replacement                                 | Thermo Fisher Scientific | 10828010              | 10%                                                           |
| Leukemia inhibitory factor (LIF)                           | Sigma-Aldrich, Inc       | L9545                 | 10 ng/ml                                                      |

|                                                       |                          |          |                |
|-------------------------------------------------------|--------------------------|----------|----------------|
| Low-glucose Dulbecco's modified Eagle's Medium (DMEM) | Thermo Fisher Scientific | 10567014 | N/A            |
| Matrigel™ Basement Membrane Matrix (Matrigel)         | BD Biosciences           | 354230   | 50%            |
| Noggin                                                | Sigma-Aldrich, Inc       | H6416    | 500ng/ml       |
| Osteogenesis Differentiation Kit                      | Thermo Fisher Scientific | A1007201 | N/A            |
| Optimal Cutting Temperature Compound                  | Sakura Finetek USA, Inc  | 4583     | N/A            |
| Phosphate-Buffered Saline pH7.4 (PBS)                 | Thermo Fisher Scientific | 10010023 | 1 x            |
| Trypsin and EDTA (T/E)                                | Thermo Fisher Scientific | 25300054 | 0.05% and 1 mM |



**Supplementary Table S5. Assay IDs for Real-time PCR (All from Thermo Fisher Scientific)**

| Gene Name  | Assay ID<br>(Taqman Expression Assay) | Product Length |
|------------|---------------------------------------|----------------|
| AQP1       | Hs01028916_m1                         | 96             |
| AnkG       | Hs00241738_m1                         | 86             |
| ABCG2      | Hs01053796_m1                         | 83             |
| BMP1       | HS00241807_m1                         | 86             |
| BMP2       | Hs00154192_m1                         | 60             |
| BMP4       | Hs03676628_s1                         | 116            |
| BMP6       | Hs01099594_m1                         | 108            |
| BMP7       | Hs00233476_m1                         | 73             |
| BMPR1A     | Hs01034913_g1                         | 94             |
| BMPR1B     | Hs00176144_m1                         | 87             |
| BMPR2      | Hs00176148_m1                         | 69             |
| CHI3L1     | Hs01072228_m1                         | 62             |
| FOXD3      | Hs00255287_s1                         | 78             |
| GAPDH      | Hs02758991_g1                         | 93             |
| HNK1       | Hs00218629_m1                         | 64             |
| KLF4       | Hs00358836_m1                         | 110            |
| Myc        | Hs99999003_m1                         | 65             |
| MGP        | Hs00969490_m1                         | 143            |
| MSX1       | Hs00427183_m1                         | 144            |
| Nanog      | Hs02387400_g1                         | 109            |
| Nestin     | Hs00707120_s1                         | 81             |
| N-cadherin | Hs01032817_m1                         | 74             |
| Oct4       | Hs00999634_gH                         | 64             |
| P75NTR     | Hs00609977_m1                         | 140            |

|                   |               |     |
|-------------------|---------------|-----|
| PDGFR $\beta$     | Hs01019589_m1 | 62  |
| Rex1              | Hs00381890_m1 | 109 |
| Sox2              | Hs01053049_s1 | 91  |
| Sox9              | Hs01001343_g1 | 101 |
| Sox10             | Hs00366918_m1 | 102 |
| SSEA4             | Hs00199480_m1 | 86  |
| Vimentin<br>(Vim) | Hs00185584_m1 | 73  |

**Supplementary Table S6: Sources of Antibodies Used for Immunofluorescence Staining**

**(IF)**

| <b>Antibodies</b>              | <b>vender</b>                 | <b>Source</b> | <b>Catalog number</b> |
|--------------------------------|-------------------------------|---------------|-----------------------|
| AQP1                           | Santa Cruz                    | Mouse         | Sc-20810              |
| Acetyl- $\alpha$ -tub          | abcam                         | Mouse         | ab24610               |
| Alexa Fluor 488 anti-mouse IgG | Thermo Fisher Scientific      | Donkey        | A21202                |
| Alexa Fluor 555 anti-bbit IgG  | Thermo Fisher Scientific      | Goat          | A21434                |
| Alexa Fluor 633 Anti-Goat      | Thermo Fisher Scientific      | Donkey        | A21082                |
| Alizarin red S                 | Sigma-Aldrich,Inc             | N/A           | A5533                 |
| Alcian blue                    | Sigma-Aldrich,Inc             | N/A           | A3157                 |
| $\beta$ -catenin               | BD                            | Mouse         | 610154                |
| c-Myc                          | abcam                         | Rabbit        | ab32072               |
| CHI3L1                         | R&D Systems (Minneapolis, MN) | Goat          | AF2599                |
| FoxD3                          | abcam                         | Mouse         | ab107248              |
| Hoechst 33342                  | Sigma-Aldrich,Inc             | N/A           | 022M4030<br>V         |
| Klf4                           | abcam                         | Rabbit        | ab72543               |
| Keratan sulfate                | EMD Millipore                 | Mouse         | MAB2022               |
| Keratocan                      | Kind gift from Wiston Kao     | Goat          | N/A                   |
| LEF1                           | Abcam                         | Rabbit        | ab53293               |
| MGP                            | Santa Cruz                    | Mouse         | Sc-81546              |
| Mounting medium                | Vector laboratories , Inc.    | N/A           | H-1000                |
| Nestin                         | abcam                         | Mouse         | ab22035               |
| Nanog                          | abcam                         | Rabbit        | ab80892               |
| N-cadherin                     | abcam                         | Moues         | ab19348               |
| Na-K-ATPase                    | EMD Millipore                 | Moue          | 05-369                |

|            |                                |        |         |
|------------|--------------------------------|--------|---------|
| Oct4       | EMD Millipore                  | Mouse  | MAB4419 |
| Oil red O  | Sigma-Aldrich, Inc             | N/A    | 9775    |
| P75NTR     | abcam                          | Rabbit | ab8874  |
| pSmad1/5/8 | Cell Signaling Technology      | Rabbit | 9511S   |
| P120       | Santa Cruz Biotechnology, Inc. | Rabbit | SC1101  |
| Sox2       | abcam                          | Mouse  | ab75485 |
| Sox9       | abcam                          | rabbit | ab26414 |
| S100A4     | abcam                          | Rabbit | ab27957 |
| Vimentin   | abcam                          | Mouse  | ab8978  |
| ZO-1       | Thermo Fisher Scientific       | Rabbit | 617300  |

## Reference

- 1 Du, Y. *et al.* Multipotent stem cells from trabecular meshwork become phagocytic TM cells. *Investigative ophthalmology & visual science* **53**, 1566-1575, doi:10.1167/iovs.11-9134 (2012).
